# Supplementary material
Source: PubMed Central journal article supplement (PMC2645718)
Supplement: d-64-00700-sup1.pdf [file d-64-00700-sup1.pdf]

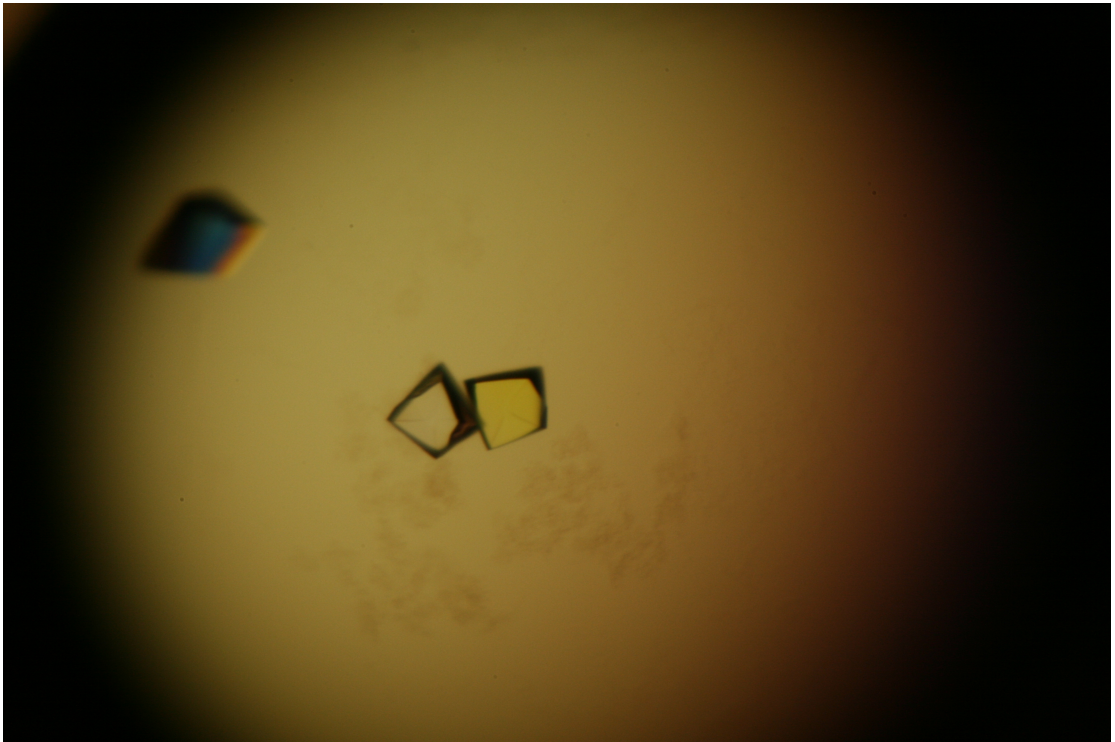

**Supplementary Figure 1.** Crystals of Fc/TM. Crystals grew in 2-3 days up to 0.2 mm in each dimension in hanging drops, where 1  $\mu$ l of reservoir solution [200 mM Zinc Acetate, 100 mM Imidazole-Malate buffer, pH 8.0, 5% PEG 3350, 5% Glycerol] was mixed with 1  $\mu$ l of protein solution at a concentration of 2 mg/ml in 50 mM Sodium Acetate, pH 5.2.

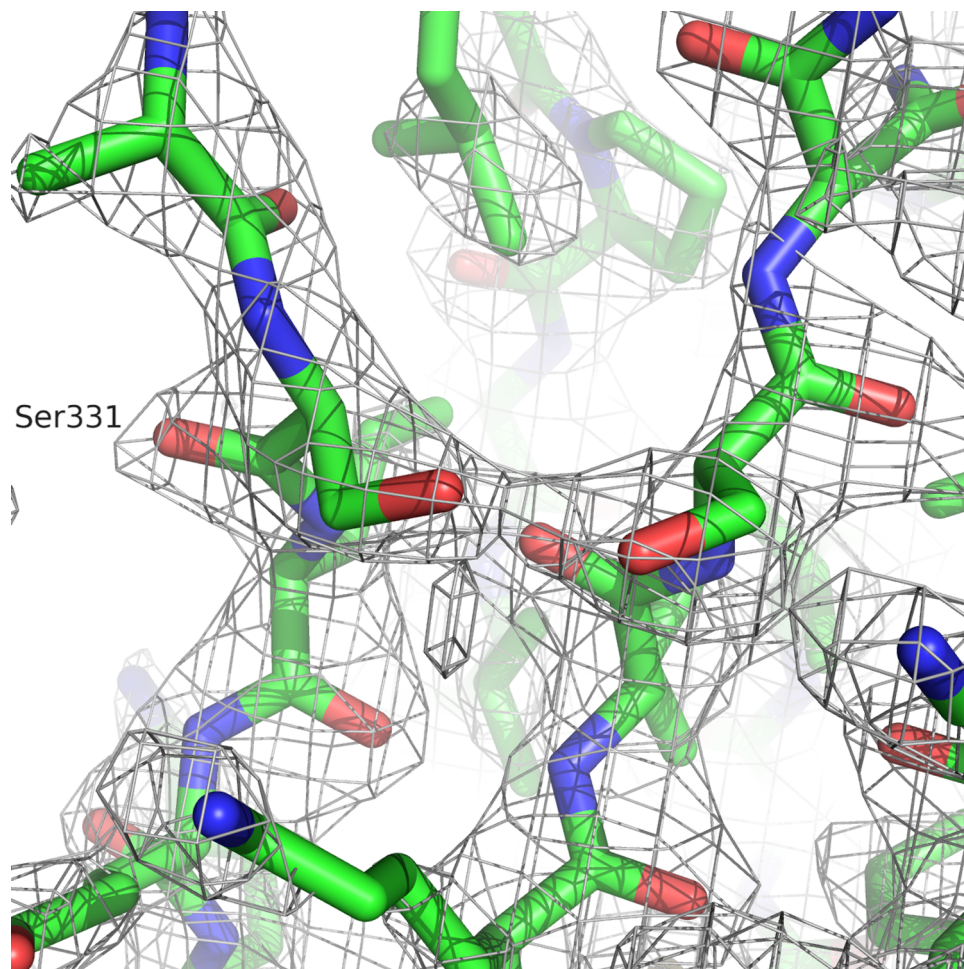

**Supplementary Figure 2.** Final SigmaA weighted electron density map is shown around the P331S mutation. The map is contoured at 1.2  $\sigma$ .
